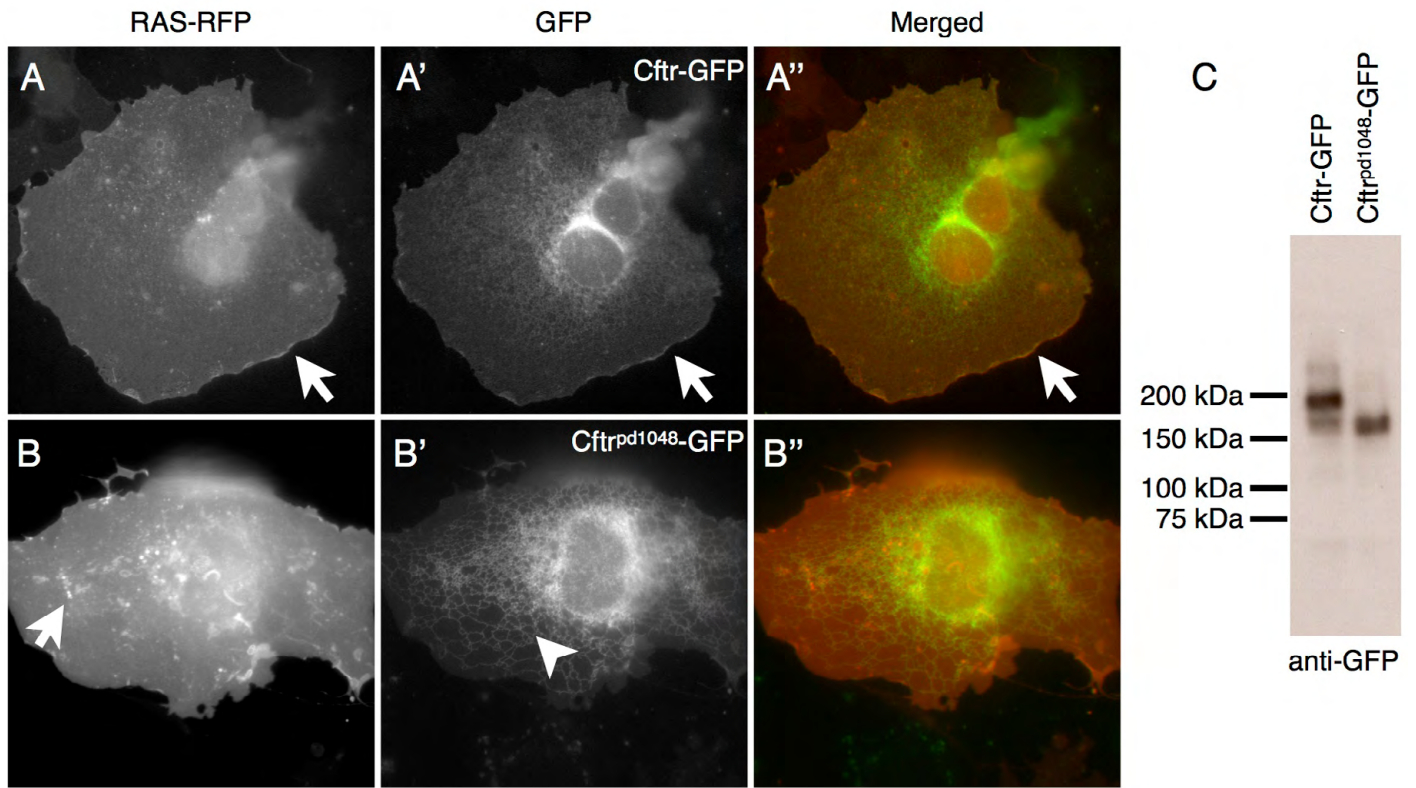

**Fig. S1. Cfr<sup>pd1048</sup>-GFP is mislocalized.** (A-A'') Zebrafish Cfr-GFP expressed in Cos-7 cells is predominantly localized to the plasma membrane. (B-B'') The Cfr<sup>pd1048</sup>-GFP fusion protein has a reduction in plasma membrane localization. Arrows point to membrane localization, arrowheads denote the internal pool. (C) A western blot for GFP detects Cfr-GFP and Cfr<sup>pd1048</sup>-GFP expressed from HEK293 cells. Scale bars: 50  $\mu$ m.

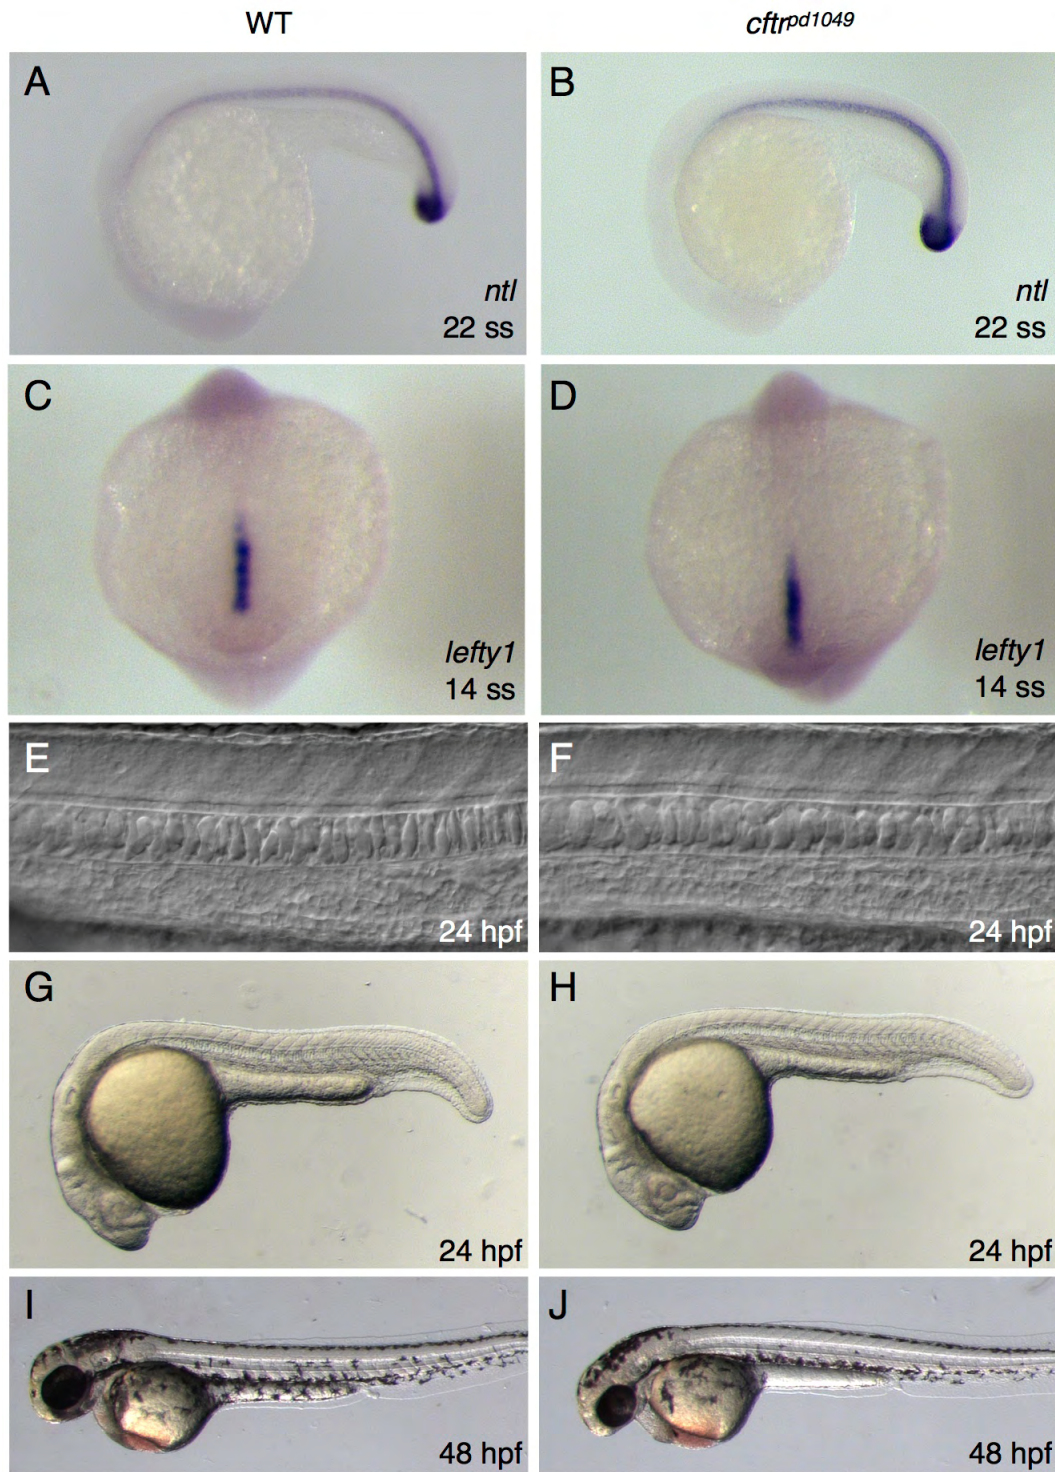

**Fig. S2. *cfr<sup>pd1049</sup>* mutants do not have midline defects.** (A,B) *In situ* hybridization of WT and mutant embryos for *ntl*. (C,D) *In situ* hybridization of WT and mutant embryos for *lefty1*. (E,F) DIC images of WT and mutant showing normal notochord and floorplate morphology. (G-J) Whole-mount brightfield images of WT and mutant embryos at (G,H) 24 hpf and (I,J) 48 hpf.

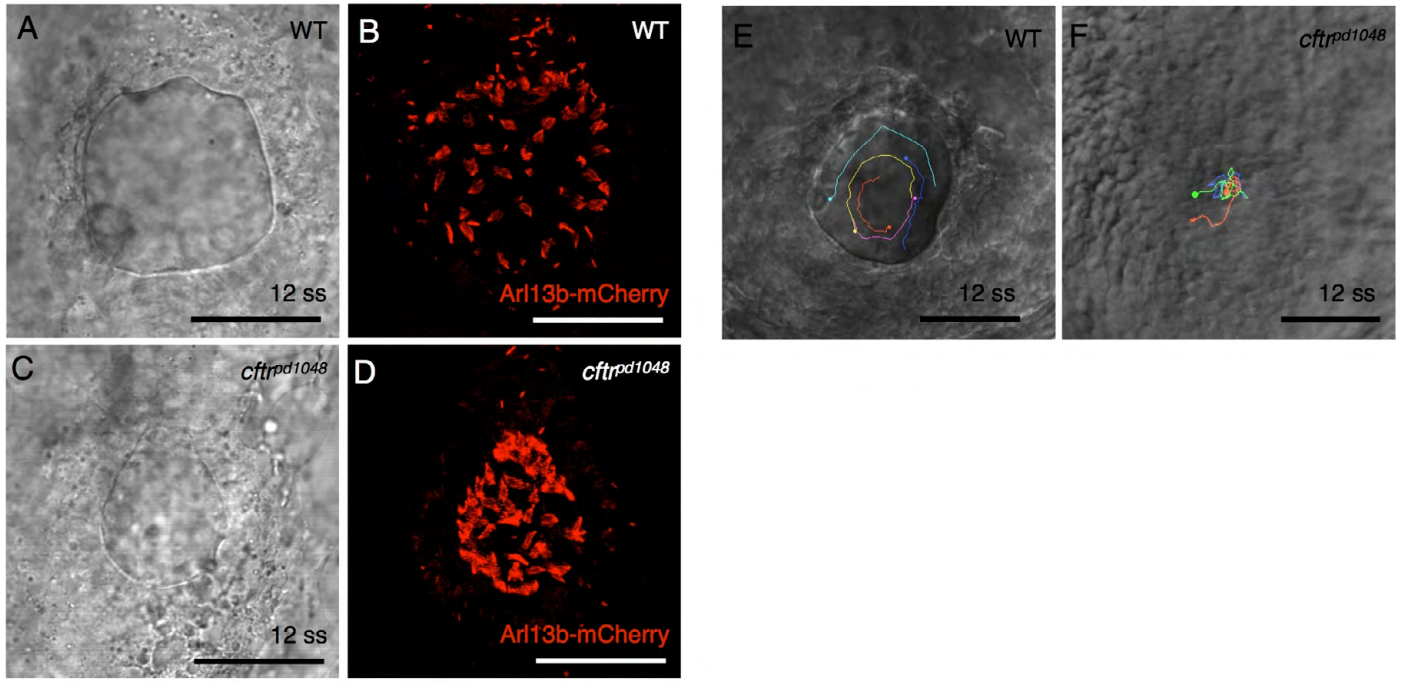

**Fig. S3. Motile cilia are crowded in *cftr*<sup>pd1048</sup> mutants.** (A,B) Brightfield and confocal imaging of 12 ss embryos injected with RNA encoding Arl13b-mCherry show normal morphology of KV, which contains a large number of motile cilia. (C,D) In the hypomorphic *cftr*<sup>pd1048</sup> allele, reduced lumen size leads to crowding of motile cilia. (E,F) Tracking of fluorescent beads in WT and *cftr*<sup>pd1048</sup> KV. Scale bars: 50 μm.

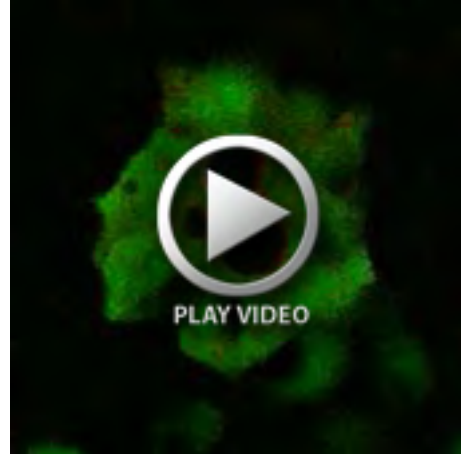

**Movie 1. Cftr-RFP expressed from the *TgBAC(cftr-RFP)* line is apically localized as multiple small lumens coalesce into one during single lumen formation in KV. *Tg(sox17:GFP)* expression marks the cytoplasm of KV epithelial cells.**
